# Supplementary material for: Molecular classification of tissue from a transformed non-Hogkin’s lymphoma case with unexpected long-time remission
Source: PubMed Central journal article supplement (PMC5225590; doi:10.1186/s40164-016-0063-0), 2017-01-11
Supplement: 40164_2016_63_MOESM2_ESM.pdf [file 40164_2016_63_MOESM2_ESM.pdf]

## Additional file 2

### Table S1.pdf

#### Micro array data files

| Patient | Disease | Array-type | GSM#       |
|---------|---------|------------|------------|
| H12     | DLBCL   | U133+2     | GSM2306879 |
| H14     | DLBCL   | U133+2     | GSM2306880 |
| H2      | DLBCL   | U133+2     | GSM2306881 |
| H22     | DLBCL   | U133+2     | GSM2306882 |
| H284    | DLBCL   | U133+2     | GSM2306883 |
| H285    | DLBCL   | U133+2     | GSM2306884 |
| H295    | DLBCL   | U133+2     | GSM2306885 |
| H296    | DLBCL   | U133+2     | GSM2306886 |
| H297    | DLBCL   | U133+2     | GSM2306887 |
| H300    | DLBCL   | U133+2     | GSM2306888 |
| H318    | DLBCL   | U133+2     | GSM2306889 |
| H321    | DLBCL   | U133+2     | GSM2306890 |
| H330    | DLBCL   | U133+2     | GSM2306891 |
| H333    | DLBCL   | U133+2     | GSM2306892 |
| H344    | DLBCL   | U133+2     | GSM2306893 |
| H345    | DLBCL   | U133+2     | GSM2306894 |
| H371    | DLBCL   | U133+2     | GSM2306895 |
| H378    | DLBCL   | U133+2     | GSM2306896 |
| H380    | DLBCL   | U133+2     | GSM2306897 |
| H437    | DLBCL   | U133+2     | GSM2306898 |
| H438    | DLBCL   | U133+2     | GSM2306899 |
| H439    | DLBCL   | U133+2     | GSM2306900 |
| H440    | DLBCL   | U133+2     | GSM2306901 |
| H441    | DLBCL   | U133+2     | GSM2306902 |
| H442    | DLBCL   | U133+2     | GSM2306903 |
| H443    | DLBCL   | U133+2     | GSM2306904 |
| H444    | DLBCL   | U133+2     | GSM2306905 |
| H446    | DLBCL   | U133+2     | GSM2306906 |
| H447    | DLBCL   | U133+2     | GSM2306907 |
| H448    | DLBCL   | U133+2     | GSM2306908 |
| H449    | DLBCL   | U133+2     | GSM2306909 |
| H45     | DLBCL   | U133+2     | GSM2306910 |
| H450    | DLBCL   | U133+2     | GSM2306911 |
| H451    | DLBCL   | U133+2     | GSM2306912 |
| H452    | DLBCL   | U133+2     | GSM2306913 |
| H454    | DLBCL   | U133+2     | GSM2306914 |
| H456    | DLBCL   | U133+2     | GSM2306915 |
| H457    | DLBCL   | U133+2     | GSM2306916 |
| H473    | DLBCL   | U133+2     | GSM2306917 |
| H479    | DLBCL   | U133+2     | GSM2306918 |
| H484    | DLBCL   | U133+2     | GSM2306919 |
| H281    | FL      | U133+2     | GSM2306870 |
| H292    | FL      | U133+2     | GSM2306871 |
| H310    | FL      | U133+2     | GSM2306872 |
| H312    | FL      | U133+2     | GSM2306873 |
| H316    | FL      | U133+2     | GSM2306874 |
| H317    | FL      | U133+2     | GSM2306875 |
| H328    | FL      | U133+2     | GSM2306876 |
| H302    | Primary | U133+2     | GSM2306877 |
| H302    | Primary | SNP6.0     | GSM2307498 |
| H385    | Relapse | U133+2     | GSM2306878 |
| H385    | Relapse | SNP6.0     | GSM2307499 |
| BB177   | Saliva  | SNP6.0     | GSM2307500 |

The Affymetrix .CEL files were deposited at the GEO website under GSE86622. In total, U133 plus 2.0 arrays were performed on 41 DLBCL, 2 tFL and 7 FL patient samples and 3 SNP6.0 arrays were performed on the saliva, primary and relapse tumors on the patient case. Clinical data are registered in the National Clinical Quality Database for Malignant Lymphoma ([www.lymphoma.dk](http://www.lymphoma.dk)).
